# Crystal Structure of the *S. solfataricus* Archaeal Exosome Reveals Conformational Flexibility in the RNA-Binding Ring

Changrui Lu<sup>1</sup>, Fang Ding<sup>1</sup>, Ailong Ke\*

Department of Molecular Biology and Genetics, Cornell University, Ithaca, New York, United States of America

## Abstract

**Background:** The exosome complex is an essential RNA 3'-end processing and degradation machinery. In archaeal organisms, the exosome consists of a catalytic ring and an RNA-binding ring, both of which were previously reported to assume three-fold symmetry.

**Methodology/Principal Findings:** Here we report an asymmetric 2.9 Å *Sulfolobus solfataricus* archaeal exosome structure in which the three-fold symmetry is broken due to combined rigid body and thermal motions mainly within the RNA-binding ring. Since increased conformational flexibility was also observed in the RNA-binding ring of the related bacterial PNPase, we speculate that this may reflect an evolutionarily conserved mechanism to accommodate diverse RNA substrates for degradation.

**Conclusion/Significance:** This study clearly shows the dynamic structures within the RNA-binding domains, which provides additional insights on mechanism of asymmetric RNA binding and processing.

**Citation:** Lu C, Ding F, Ke A (2010) Crystal Structure of the *S. solfataricus* Archaeal Exosome Reveals Conformational Flexibility in the RNA-Binding Ring. PLoS ONE 5(1): e8739. doi:10.1371/journal.pone.0008739

**Editor:** Petri Kursula, University of Oulu, Finland

**Received:** October 19, 2009; **Accepted:** December 18, 2009; **Published:** January 15, 2010

**Copyright:** © 2010 Lu et al. This is an open-access article distributed under the terms of the Creative Commons Attribution License, which permits unrestricted use, distribution, and reproduction in any medium, provided the original author and source are credited.

**Funding:** This study is supported by Cornell MBG department grant. The funders had no role in study design, data collection and analysis, decision to publish, or preparation of the manuscript.

**Competing Interests:** The authors have declared that no competing interests exist.

\* E-mail: ailong.ke@cornell.edu

These authors contributed equally to this work.

## Introduction

The exosome and its related bacterial polynucleotide phosphorylase (PNPase) represent a class of conserved multi-subunit protein complexes responsible for the 3'-to-5' processing and degradation of RNA [1,2,3]. In the nucleus of eukaryotic cells, the exosome is responsible for the 3'-end trimming of rRNA, snRNA, and snoRNA, but also plays a major role in the degradation of the spliced introns and pre-mRNAs that fail the quality control processes [4,5,6,7,8,9,10,11,12,13]. In addition, the nuclear exosome participates in nuclear surveillance pathways to degrade aberrant rRNA, tRNA, and mRNA transcripts [6,11,12,14,15,16,17]. In the cytoplasm, the exosome is a key player during mRNA turnover, and is responsible for the 3'-to-5' degradation of normal mRNA after deadenylation as well as for the products of endonucleolytic events [18], including those of the RNAi pathway [19]. Like the nuclear exosome, the cytoplasmic exosome also participates in mRNA surveillance pathways such as nonsense-mediated decay, non-stop decay, no-go decay, and ARE-mediated decay to eliminate aberrant mRNAs [20,21,22,23,24].

The function and architecture of the exosome is conserved among all three kingdoms of life. Its bacterial counterpart, PNPase, is an 81 KDa polypeptide that trimerizes to form a ~240 KDa complex. The primary sequence of the PNPase contains two domains homologous to RNase PH, followed by

RNA-binding KH and S1 domains [25]. Architecturally, the ~250 KDa prototypic archaeal exosome is similar to the bacterial PNPase, consisting of a catalytic ring containing a trimer of Rrp41/Rrp42 heterodimers, and with a trimetric Rrp4 or Csl4 RNA-binding ring stacked on the top. Both Rrp41 and Rrp42 are homologous to RNase PH, but only Rrp41 possesses the phosphorolytic 3'-to-5' exoribonuclease activity [26]. The core eukaryotic exosome consists of nine different subunits [27]. Six of them classify into two RNase PH-like groups: Rrp41-like (Rrp41, Rrp46, and Mtr3) and Rrp42-like (Rrp42, Rrp43, and Rrp45), however, in yeast and human none of these subunits possess any exoribonuclease activity [27,28]. The rest of the three subunits (Rrp4, Rrp40, and Csl4) are predicted to be RNA binding proteins [10]. The eukaryotic core exosome interacts with many protein cofactors including 3'-to-5' exoribonuclease, RNA helicase, and polyadenylase to carry out its RNA processing and degradation functions. Crystal structures of the PNPase [25,29], archaeal [30,31,32], and eukaryotic [27] exosomes have been determined, from which it has become clear that these complexes adopt a very similar doughnut-shaped architecture.

The structure and enzymatic mechanism of the archaeal exosome have been extensively studied. Published structural work revealed that the archaeal exosomes adopt a three-fold symmetric structure, where a trimetric RNA-binding ring packs on top of the catalytic ring consisting of a trimer of Rrp41/Rrp42 heterodimers.

A large “processing chamber” was found inside the catalytic ring, where three identical phosphorolytic active sites reside. RNA substrate likely gains access to the “processing chamber” from the side of the RNA-binding ring through a narrow pore at the neck region, which only allows the passage of a single-stranded (ss) RNA [31,32,33]. The proposed recruitment pathway is consistent with the observation that the archaeal exosome is stalled by strong RNA secondary structures, leaving RNA products with 7–9 nucleotides-long 3′ overhangs [26,34].

To further understand the RNA recruitment mechanism of the exosome family of macromolecular machines, we determined the crystal structure of the archaeal *Sulfolobus solfataricus* exosome. We observed that while the catalytic ring of the *S. solfataricus* exosome adopts a three-fold symmetric structure, its RNA-binding ring displays considerable rigid body and thermal motions, which broke its internal symmetry. Since conformational flexibility was also observed in the RNA-binding ring of the bacterial PNPase [25,29], we propose that the conformational dynamics may be harnessed by the archaeal exosome, and perhaps by all exosome family members, to accommodate the binding of various RNA substrates and to disrupt their structures.

## Results

### Reconstitution and Phosphorolytic RNase Activity in the Four-Subunit Archaeal Exosome

When we started the work, studies had shown that all four eukaryotic exosome homologous proteins, namely Rrp41, Rrp42, Rrp4, and Csl4, are present in the purified archaeal exosome complex [31,34,35,36,37,38]. We therefore attempted to reconstitute the archaeal *Sulfolobus solfataricus* exosome by co-expressing all four exosome subunits from a polycistronic construct in *E. coli* [39,40,41]. As shown in the results, while Rrp4, Rrp41, and Rrp42 were present at stoichiometric amounts in the purified complex, the Csl4 protein appeared sub-stoichiometric (Fig. 1a). The purified exosome complex was shown to be monodispersed and homogeneous under negative staining EM (data not shown).

To demonstrate the phosphorolytic RNase activity in our purified archaeal exosome, we incubated the purified exosome with a 254-nt RNA substrate flanked by a strong 5′-tertiary RNA structure (the hepatitis delta virus ribozyme) and a 161-nt flexible 3′ tail under multiple turnover conditions. As shown in Figure 1b, the archaeal exosome is highly processive in degrading the RNA substrate. The strong tertiary structure in the HDV ribozyme effectively blocks the action of the exosome, resulting in accumulation of a procession intermediate. The enzymatic activity is strictly phosphate-dependent as the activity decreased to background level in the absence of  $\text{PO}_4^{3-}$  or in the presence of 20 mM  $\text{SO}_4^{2-}$  (data not shown).

We obtained the crystals of the four-protein component archaeal exosome complex grown in ammonium sulfate and polyethylene glycol 4000 (PEG 4000). The crystals diffracted X-rays to 2.4 Å resolution at a synchrotron radiation source. Data processing by HKL2000 [42], MOSFLM [43] was problematic as a large fraction of data were rejected in all possible space groups (the most likely being P2/P21). We speculate this is due to epitaxial twinning of Rrp4-exosome and Csl4-exosome crystal lattices. Not surprisingly, no structure solution was obtained from the four-subunit *Sulfolobus solfataricus* exosome crystals.

### Crystallization and Structure Determination of the Rrp4-Exosome Isoform

We reasoned that the problematic diffraction pattern from the four-subunit exosome crystals was due to the presence of a sub-stoichiometric amount of Csl4 protein. To generate homogeneous

exosome samples, the Csl4 gene was deleted from the co-expression cassette and biochemically, the resulting Rrp4-exosome isoform behaved similarly as the four-subunit complex. We independently crystallized the complex under high PEG conditions similar to that reported by the Conti group [30,44]. A complete data set was collected to 2.9 Å showing that the crystals belong to C2 space group (Table 1).

We solved the *S. solfataricus* exosome Rrp4-isoform structure by molecular replacement using the Rrp41/Rrp42 heterodimer in the *S. solfataricus* exosome catalytic core (PDB code: 2BR2) as the search model [34]. A single exosome core complex was reconstructed in the asymmetric unit after the rotation and translation searches successfully located each of the three heterodimers. Although no model corresponding to the Rrp4 protein was included in the search model, the resulting molecular replacement phases allowed the initial tracing of Rrp4 protein backbone. Despite similarities in the crystallization condition, unit cell dimensions and packing arrangement between our crystal structure and that by the Conti group, we noticed early on in our refinement that applying strict three-fold non-crystallographic symmetry (NCS), as the Conti group did [30,34,44], caused considerable fragmentation of the electron densities in the RNA-binding ring where the trimeric Rrp4 proteins are located. We therefore continued structure refinement without the three-fold NCS, re-traced one of the three copies of Rrp4, and continued refinement until the  $R_{\text{work}}/R_{\text{free}}$  were within the acceptable range of 26.7%/28.9%.

### Conformation Flexibility Mainly Within the RNA-Binding Ring

The catalytic ring in our *S. solfataricus* Rrp4-exosome crystal structure (Fig. 1c) is very similar to that of the catalytic mutant structure from the same organism (PDB code 2JE6) previously reported [30]. The three copies of Rrp41/Rrp42 heterodimers within the catalytic ring align extremely well with their counterparts in the previous structure [30], even though the three-fold NCS was not enforced in our structure, the three heterodimers does not deviate notably from their symmetric positions. The r.m.s.d. of the C $\alpha$  atom alignment is 0.6 Å for the whole catalytic ring (1529 aa) alignment, and between 0.2 to 0.4 Å for pair-wise Rrp41/Rrp42 heterodimer (501 aa) alignment within our structure. This result suggests that the positions of the heterodimers deviate slightly (on average  $\sim 0.3$  Å) from the symmetric positions.

The three Rrp4 subunits (designated Chains C, F, and I in our structure, respectively) in the RNA-binding ring of our structure, however, deviate significantly from their three-fold symmetric positions as reported previously (Fig. 2 [30]). When one of the Rrp4 subunits (i.e. Chain C) is superimposed with that in the Conti structure, the other two Rrp4 proteins deviate significantly from their symmetric counterparts (Fig. 2 and Fig. 3a). In addition to rigid body shifts, we observed conformational heterogeneity among Rrp4 subunits. While two of the three copies (Chain C and I) overlap reasonably well with their counterparts in the previous structure [30], with the r.m.s.d of the C $\alpha$  alignment at 0.5 Å and 0.6 Å, respectively, and at 0.8 Å with each other, the third Rrp4 copy (Chain F) adopts a significantly different conformation (the r.m.s.d. of 250 C $\alpha$  alignment is 1.5 Å with the previously published structure [30], Fig. 3b–d). Compared with the published structure by Lorentzen *et al.* [30], almost identical sets of intramolecular interactions were observed between the Rrp4 trimeric cap and the Rrp41/42 heterodimers. The conformational changes are not due to changes in the crystal packing environment, as minimal crystal contacts were observed around the Rrp4 ring. The exceptionally large geometric deviation in

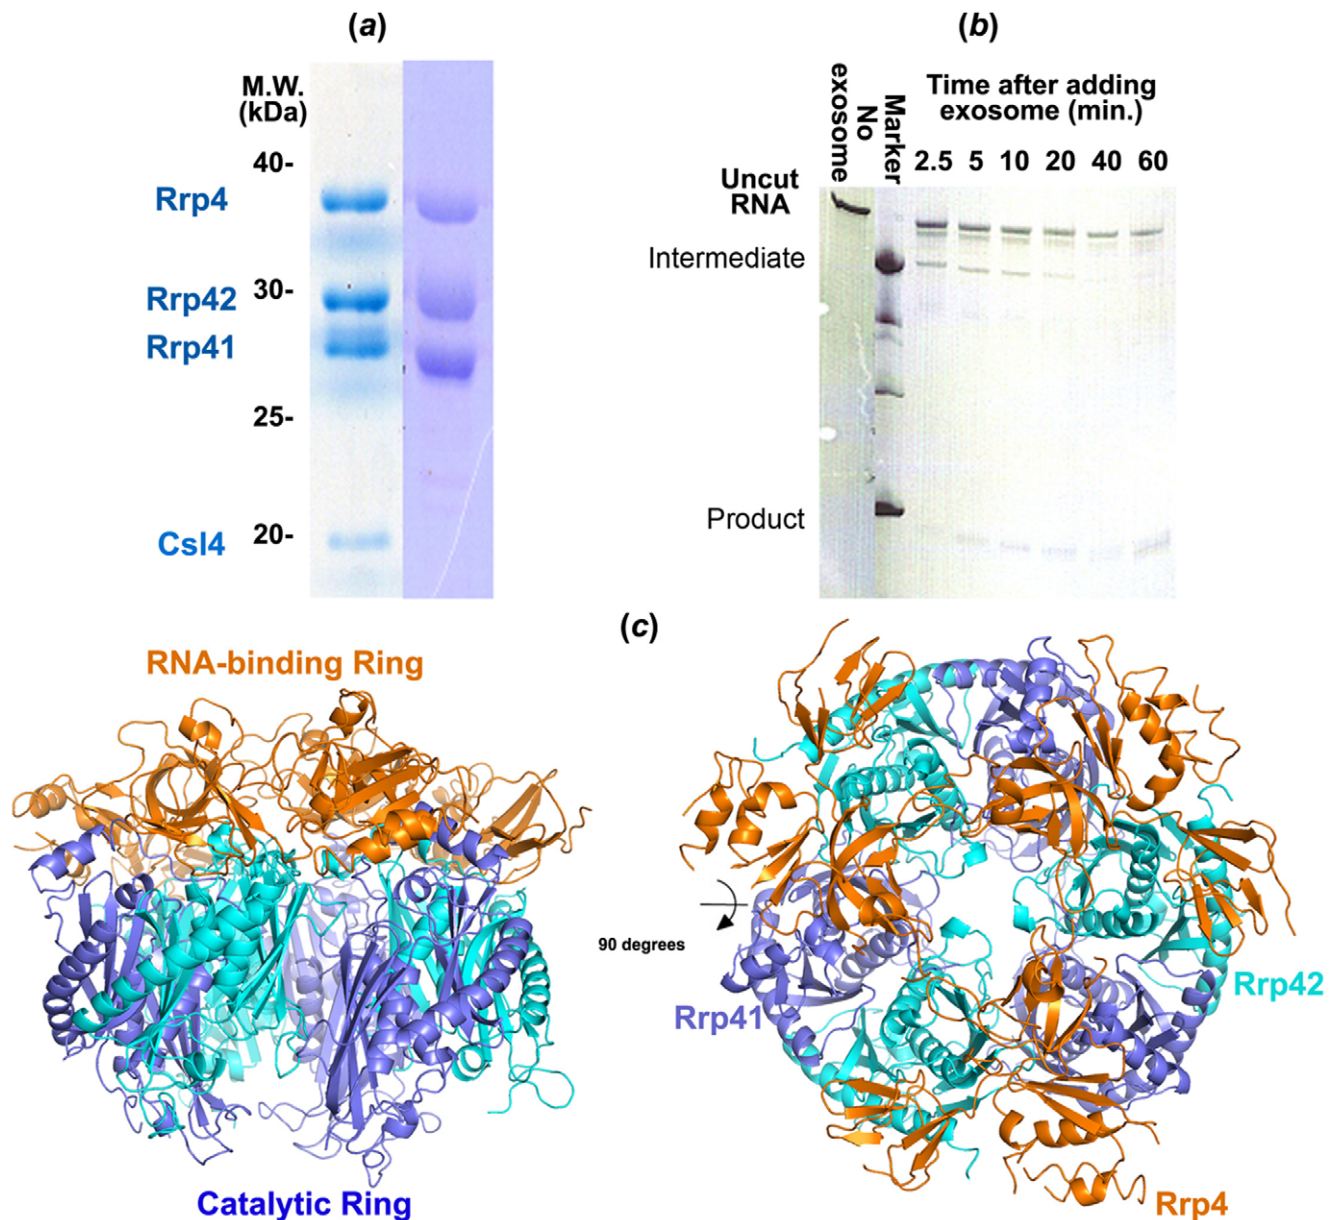

**Figure 1. Purification and activity assay of the purified *S. solfataricus* full exosome.** (a) SDS-PAGE of the purified *S. solfataricus* full exosome (left) and the Rrp4-exosome isoform (right). (b) RNase activity assay for the intact *S. solfataricus* exosome. The exosome is stalled by the HDV ribozyme sequence. (c) Side and top-down view of the 2.9 Å *S. solfataricus* exosome structure. Gold, trimeric Rrp4 RNA-binding ring; blue/cyan, Rrp41/Rrp42 catalytic ring.

doi:10.1371/journal.pone.0008739.g001

Chain F is due to a rigid body hinge motion at the linker region between the N-terminal domain and the S1/KH domains, because when aligned separately, each domain agrees well with their counterparts in other two Rrp4 subunits (r.m.s.d. of C $\alpha$  alignments for the N-ter, S1, and KH domains are at 0.3 Å (50 aa), 0.3 Å (70 aa), and 0.7 Å (115 aa), respectively, Fig. 3b–d). The hinge motion causes the S1 and KH domains in chain F to move away from the central channel and thus increases the diameter of the pore opening.

Besides conformational heterogeneity caused by the hinge motion, the Rrp4 trimer also exhibits distinct temperature factor distributions, which reflect the RNA binding ring's inherent conformational flexibilities. TLS refinement followed by thermal ellipsoids analysis revealed unique thermal motions in Chain I

copy of Rrp4 (Fig. 4a, b). Although Chain C and Chain I of Rrp4 adopt very similar conformations, Chain I displays considerably higher thermal motion than Chain C, manifested by a higher average temperature factor of 81 versus 61 (Fig. 4a, c), as well as wider thermal ellipsoids in Chain I (Fig. 4b). Each Rrp4 subunit has distinct temperature factor distributions within the polypeptide (Fig. 4a, c). The shape of the thermal ellipsoids revealed that Chain I wobbles to a larger extent on top of the catalytic ring, and in a concentric motion relative to the central RNA-processing chamber. All above observations indicate that the Rrp4 trimeric cap is intrinsically flexible, despite bound to the relatively rigid catalytic ring. The observed conformational heterogeneity agrees perfectly with the function of the RNA-binding ring of the exosome to accommodate diverse RNA substrates.





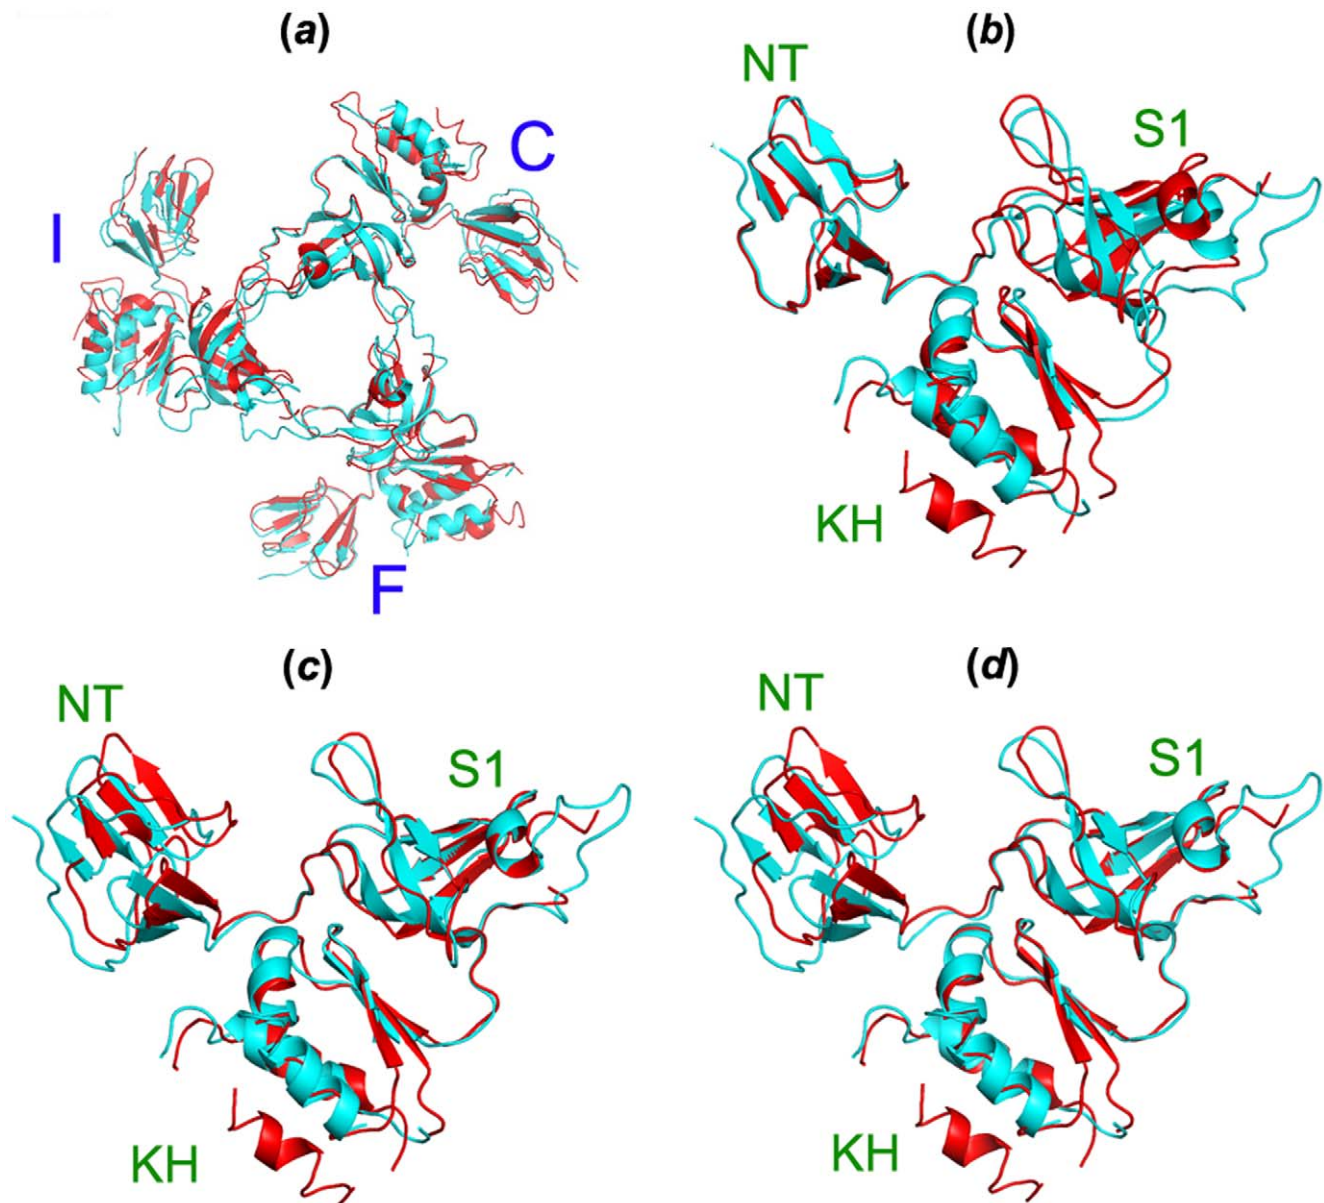

**Figure 3. Structure alignment of Rrp4 trimeric cap between our *S. solfataricus* exosome (red) and that Lorentzen *et al* previously reported [30] (cyan).** (a) Overall alignment of the 750-aa trimeric cap (r.m.s.d. = 1.5 Å). (b) Alignment of the most flexible Rrp4 subunit (Chain F) by N-ter domain, aa 1–50 (r.m.s.d. = 0.4 Å). (c) Alignment of Chain F subunit by S1 domain, aa 56–126 (r.m.s.d. = 0.3 Å). (d) Alignment of Chain F subunit by KH domain, aa 135–250 (r.m.s.d. = 0.7 Å).  
doi:10.1371/journal.pone.0008739.g003

(1) The conformational flexibility may play a passive role in accommodating the binding of diverse RNA substrates before threading the RNA into the catalytic ring. The fact that each of the three Rrp4 subunits possesses distinct thermal and conformational characteristics suggests that the exosome might respond to the substrate by activating one of the three Rrp4 subunits. It is also possible that the substrate binding is a cooperative event that involves more than one Rrp4 subunit. (2) On the other hand, the increased thermal motion and flexibility in this region may further play an active role in unzipping the secondary structures of the RNA substrates so that the RNA is 'ready' to pass through the narrow neck region of the exosome, which can only accommodate a single-stranded RNA. The RNA-binding ring therefore resembles an RNA helicase in its RNA-unwinding function. Consistent with this

hypothesis, we observed that a strong tertiary structure, such as the HDV ribozyme, initially stalls the action of the *S. solfataricus* exosome, but can later be gradually degraded by the exosome, albeit at much slower rate (Fig. 1b).

## Materials and Methods

### Expression, and Purification of the 4-Subunit *Sulfolobus solfataricus* Exosome

Genes encoding Rrp4, Rrp41, Rrp42, and Csl4 have been cloned from the genomic DNA of the archaeal hyperthermophile *Sulfolobus solfataricus*. We designed a polycistronic construct to promote exosome assembly by co-expressing four subunits in *E. coli* simultaneously. This was inspired by the observation that the



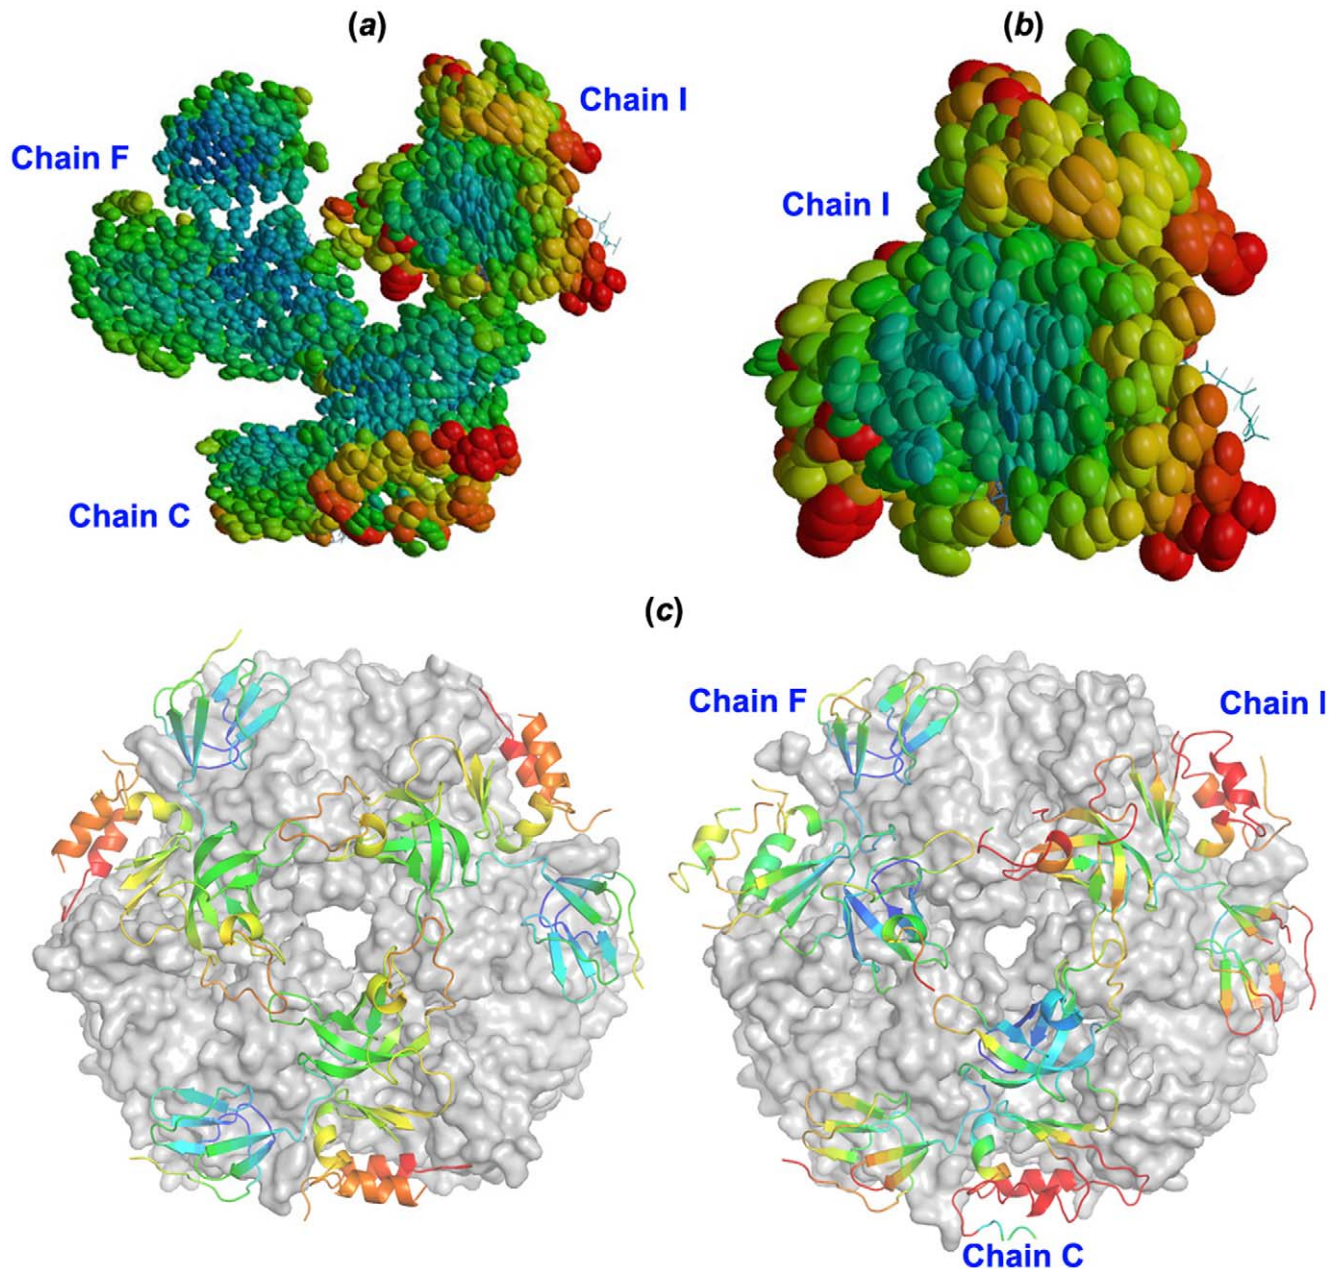

**Figure 4. Detecting thermal motions in Rrp4 RNA-binding ring using thermal ellipsoid and B-factor analyses.** (a) Overall analysis of the trimeric cap. (b) According to the thermal ellipsoid analysis, the most thermal flexible Rrp4 subunit is Chain I, but not Chain F, which displays the largest rigidbody motion. TLS sensors were obtained from TLS refinement in Refmac5 [48] (see Methods section for details) and plotted using Raster3D [51]. (c) B-factor comparison of the Rrp4 between our *S. solfataricus* exosome (left) and that Lorentzen *et al* previously reported [30] (right). B-factor coloring: blue, 30 and below; red, 100 and above. doi:10.1371/journal.pone.0008739.g004

three Rrp genes are arranged as a superoperon (in the order of Rrp4-Rrp41-Rrp42) in the archaeal genomes [45]. The order of the genes was preserved in the polycistronic vector construction, followed by the insertion of the Csl4 gene [39,41]. A His<sub>6</sub>-tag and a Tobacco Etch Virus (TEV) protease cleavage site were engineered into the N-terminus of Rrp4 to facilitate purification.

After overexpression in *E. coli*, the supernatant of the cell lysate was incubated at 75° for half an hour and precipitated using centrifugation to efficiently denature and remove *E. coli* proteins. Target proteins were then purified using nickel affinity chromatography using supernatant from the heat treatment. All four

exosome subunits were present in the eluate in roughly predicted stoichiometry. Purified proteins were then dialyzed to a buffer containing 25 mM Tris-HCl pH 8.0 and 100 mM NaCl, incubated with TEV protease to remove the His<sub>6</sub>-tag, and further purified to homogeneity on an anion exchange chromatography (Mono Q column). Alternatively, the complex can be purified using size exclusion chromatography (Suprose 6 column). We confirmed the identity of the four archaeal proteins in the purified exosome by separation on SDS polyacrylamide gel (SDS-PAGE), followed by in-gel protease digestion, electrospray mass spectrometry, and data base matching (data not shown).

## RNase Assay

The 254-nt RNA substrate containing the hepatitis delta virus ribozyme followed by a 161-nt 3'-tail was generated from *in vitro* T7 RNA polymerase transcription reaction and purified following standard protocols as previously described [46]. The RNA was incubated with the purified archaeal exosome was incubated at 37°C under multiple turnover conditions (~10 pmol enzyme, ~40 pmol substrate) in a buffer containing 25 mM Tris-HCl pH 7.5, 100 mM NaCl, and 10 mM inorganic phosphate ( $\text{PO}_4^{3-}$ ). Control experiments were carried out in the same buffer in the absence of  $\text{PO}_4^{3-}$  or in the presence of 20 mM  $\text{SO}_4^{3-}$ .

## Crystallization and Structure Determination of the Rrp4-Exosome

Our Rrp4-exosome isoform was concentrated to ~10 mg/mL in a buffer containing 100 mM Tris-HCl pH 8.6, 200 mM  $\text{Mg}(\text{Ac})_2$ , and 25 mM  $(\text{NH}_4)_2\text{SO}_4$ , and crystallized by hanging vapor diffusion against a well solution containing 30% PEG4000 with 100 mM Tris-HCl pH 8.6, 200 mM  $\text{Mg}(\text{Ac})_2$ . Crystals appeared after two months incubation at room temperature among heavy precipitations. The crystals were soaked in the well solution plus 10 mM  $\text{NaSO}_4$  for 10 minutes before flash-frozen in liquid nitrogen. A complete data set to 2.9 Å was collected at 90K from CHESS beamline A1. The crystal belongs to C2 space group with unit cell dimensions of 151 Å × 145 Å × 97 Å, and  $\gamma = 93.8^\circ$ , as indexed and scaled by HKL2000 [42]. The apo Rrp4-exosome structure was solved by molecular replacement using PHASER [47] from the structure of the catalytic core of the *S. solfataricus* exosome (PDB code: 2BR2) [34] as the search model. Initial search using the nine-subunit complex resulted in very poor and untraceable maps in seven out of the nine subunits, while searching attempt with three copies each of individual Rrp41 or Rrp42 subunits resulted in more than 100 steric clashes. Finally, a search using three pairs of Rrp41–42 heterodimer produced a reasonable solution and electron density map revealing traceable difference between the search model and our structure. Rigid body refinement by Refmac [48] further improved the overall electron density and revealed extra electron densities corresponding to Rrp4 in the  $F_o - F_c$  difference map. Initially, strict three-fold non-crystallographic symmetry (NCS) was

applied to refine the catalytic ring structure (Rrp41/42 heterotrimer) but was dropped when refinement can no longer improve the model and  $R_{\text{free}}$ . Only two of the three Rrp4 subunits can be correctly placed by molecular replacement in PHASER using the published Rrp4 structure (PDB code 2JE6) [30], while attempting to position the third subunit resulted in broken densities. Therefore the third Rrp4 subunit was manually traced using COOT [49] and built from three- to ten-amino acid-long peptide segments of Rrp4. At this stage the strict NCS matrix was removed from subsequent refinements. Successive steps of manual refinement of all nine subunits using COOT [49] allowed tracing of more flexible regions as well as locating three sulfate ions at catalytic core domains. Multiple rounds of manual fitting followed by restrained and rigid body refinement in Refmac5 [48] reduced  $R_{\text{work}}/R_{\text{free}}$  to 0.31/0.34 and positioned all three Rrp4 proteins into density map. At this stage the,  $R_{\text{work}}/R_{\text{free}}$  stopped dropping due to over refinement in some of the subunits and under refinement in others. Therefore, we treated each of the nine subunits separately and independently subject them to energy minimization, simulated annealing, grouped B-factor refinement in CNS [50] while holding remaining eight subunits in position, which reduced  $R_{\text{work}}/R_{\text{free}}$  to 0.29/0.31. We then defined a total of 15 translation-liberation-screw (TLS) groups in the entire structure: three of each Rrp41, Rrp42, N-ter, S1 and KH domain of Rrp4 subunit, to be used in TLS refinement in Refmac5 which ultimately reduced refinement statistics to the final  $R_{\text{work}}/R_{\text{free}} = 0.268/0.289$  (Table 1, Fig. 1d). The TLS refinement result is visualized by Raster3D [51]. The structure is verified by simulated annealing omit maps by excluding 7.5 percent of structure in each calculation.

## Acknowledgments

We thank Anirban Chowdhury for helpful discussion and proof-reading the manuscript.

## Author Contributions

Conceived and designed the experiments: AK. Performed the experiments: CL FD. Analyzed the data: CL. Contributed reagents/materials/analysis tools: FD. Wrote the paper: CL.

## References

- Butler JS (2002) The yin and yang of the exosome S0962892401022255 [pii]. Trends Cell Biol 12: 90–96.
- Houseley J, LaCava J, Tollervey D (2006) RNA-quality control by the exosome nrm1964 [pii] 10.1038/nrm1964 [doi]. Nat Rev Mol Cell Biol 7: 529–539.
- Parker R, Song H (2004) The enzymes and control of eukaryotic mRNA turnover. Nature Structural & Molecular Biology 11: 121–127.
- van Hoof A, Lennertz P, Parker R (2000) Yeast exosome mutants accumulate 3'-extended polyadenylated forms of U4 small nuclear RNA and small nucleolar RNAs. Mol Cell Biol 20: 441–452.
- van Hoof A, Staples RR, Baker RE, Parker R (2000) Function of the ski4p (Csl4p) and Ski7p proteins in 3'-to-5' degradation of mRNA. Mol Cell Biol 20: 8230–8243.
- Allmang C, Mitchell P, Petfalski E, Tollervey D (2000) Degradation of ribosomal RNA precursors by the exosome gkd297 [pii]. Nucleic Acids Res 28: 1684–1691.
- Bousquet-Antonelli C, Presutti C, Tollervey D (2000) Identification of a regulated pathway for nuclear pre-mRNA turnover S0092-8674(00)00065-9 [pii]. Cell 102: 765–775.
- Allmang C, Kufel J, Chanfreau G, Mitchell P, Petfalski E, et al. (1999) Functions of the exosome in rRNA, snoRNA and snRNA synthesis 10.1093/emboj/18.19.5399 [doi]. EMBO J 18: 5399–5410.
- Allmang C, Petfalski E, Podtelejnikov A, Mann M, Tollervey D, et al. (1999) The yeast exosome and human PM-Scl are related complexes of 3' → 5' exonucleases. Genes Dev 13: 2148–2158.
- Mitchell P, Petfalski E, Shevchenko A, Mann M, Tollervey D (1997) The exosome: a conserved eukaryotic RNA processing complex containing multiple 3' → 5' exoribonucleases S0092-8674(00)80432-8 [pii]. Cell 91: 457–466.
- Kadaba S, Krueger A, Trice T, Krecic AM, Hinnebusch AG, et al. (2004) Nuclear surveillance and degradation of hypomodified initiator tRNAMet in *S. cerevisiae* 10.1101/gad.1183804 [doi] 1183804 [pii]. Genes Dev 18: 1227–1240.
- Milligan L, Torchet C, Allmang C, Shipman T, Tollervey D (2005) A nuclear surveillance pathway for mRNAs with defective polyadenylation 25/22/9996 [pii] 10.1128/MCB.25.22.9996-10004.2005 [doi]. Mol Cell Biol 25: 9996–10004.
- Burkard KT, Butler JS (2000) A nuclear 3'-5' exonuclease involved in mRNA degradation interacts with Poly(A) polymerase and the hnRNA protein Npl3p. Molecular and Cellular Biology 20: 604–616.
- Hilleren P, McCarthy T, Rosbash M, Parker R, Jensen TH (2001) Quality control of mRNA 3'-end processing is linked to the nuclear exosome 10.1038/35097110 [doi] 35097110 [pii]. Nature 413: 538–542.
- Vasudevan S, Peltz SW (2003) Nuclear mRNA surveillance S0955067403000516 [pii]. Curr Opin Cell Biol 15: 332–337.
- Lee A, Henras AK, Chanfreau G (2005) Multiple RNA surveillance pathways limit aberrant expression of iron uptake mRNAs and prevent iron toxicity in *S. cerevisiae* S1097-2765(05)01348-1 [pii] 10.1016/j.molcel.2005.05.021 [doi]. Mol Cell 19: 39–51.
- Hieronimus H, Yu MC, Silver PA (2004) Genome-wide mRNA surveillance is initiated by endonucleolytic cleavage in Drosophila 10.1101/gad.1241204 [doi]. Genes Dev 18: 2652–2662.
- Gatfield D, Izaurralde E (2004) Nonsense-mediated messenger RNA decay is initiated by endonucleolytic cleavage in Drosophila 10.1038/nature02559 [doi] nature02559 [pii]. Nature 429: 575–578.
- Orban TI, Izaurralde E (2005) Decay of mRNAs targeted by RISC requires XRN1, the Ski complex, and the exosome rna.7231505 [pii] 10.1261/rna.7231505 [doi]. RNA 11: 459–469.
- Hilleren P, Parker R (2003) Cytoplasmic degradation of splice-defective pre-mRNAs and intermediates S109727650300488X [pii]. Mol Cell 12: 1453–1465.

21. Chen CY, Gherzi R, Ong SE, Chan EL, Raijmakers R, et al. (2001) AU binding proteins recruit the exosome to degrade ARE-containing mRNAs S0092-8674(01)00578-5 [pii]. *Cell* 107: 451–464.
22. Doma MK, Parker R (2006) Endonucleolytic cleavage of eukaryotic mRNAs with stalls in translation elongation. *Nature* 440: 561–564.
23. van Hoof A, Frischmeyer PA, Dietz HC, Parker R (2002) Exosome-mediated recognition and degradation of mRNAs lacking a termination codon 10.1126/science.1067272 [doi] 295/5563/2262 [pii]. *Science* 295: 2262–2264.
24. Mitchell P, Petfalski E, Houalla R, Podtelejnikov A, Mann M, et al. (2003) Rps47p is an exosome-associated protein required for the 3' processing of stable RNAs. *Mol Cell Biol* 23: 6982–6992.
25. Symmons MF, Jones GH, Luisi BF (2000) A duplicated fold is the structural basis for polynucleotide phosphorylase catalytic activity, processivity, and regulation. *Structure* 8: 1215–1226.
26. Lorentzen E, Conti E (2005) Structural basis of 3' end RNA recognition and exoribonucleolytic cleavage by an exosome RNase PH core S1097-2765(05)01715-6 [pii] 10.1016/j.molcel.2005.10.020 [doi]. *Mol Cell* 20: 473–481.
27. Liu Q, Greimann JC, Lima CD (2006) Reconstitution, activities, and structure of the eukaryotic RNA exosome S0092-8674(06)01427-9 [pii] 10.1016/j.cell.2006.10.037 [doi]. *Cell* 127: 1223–1237.
28. Dziembowski A, Lorentzen E, Conti E, Seraphin B (2007) A single subunit, Dis3, is essentially responsible for yeast exosome core activity nsmb1184 [pii] 10.1038/nsmb1184 [doi]. *Nat Struct Mol Biol* 14: 15–22.
29. Shi Z, Yang WZ, Lin-Chao S, Chak KF, Yuan HS (2008) Crystal structure of Escherichia coli PNase: central channel residues are involved in processive RNA degradation. *RNA (New York, NY)* 14: 2361–2371.
30. Lorentzen E, Dziembowski A, Lindner D, Seraphin B, Conti E (2007) RNA channelling by the archaeal exosome 7400945 [pii] 10.1038/sj.embor.7400945 [doi]. *EMBO Rep* 8: 470–476.
31. Buttner K, Wenig K, Hopfner KP (2005) Structural framework for the mechanism of archaeal exosomes in RNA processing S1097-2765(05)01713-2 [pii] 10.1016/j.molcel.2005.10.018 [doi]. *Mol Cell* 20: 461–471.
32. Navarro MV, Oliveira CC, Zanchin NI, Guimaraes BG (2008) Insights into the mechanism of progressive RNA degradation by the archaeal exosome M801005200 [pii] 10.1074/jbc.M801005200 [doi]. *J Biol Chem*.
33. Lorentzen E, Conti E (2006) The exosome and the proteasome: nano-compartments for degradation S0092-8674(06)00567-8 [pii] 10.1016/j.cell.2006.05.002 [doi]. *Cell* 125: 651–654.
34. Lorentzen E, Walter P, Fribourg S, Evgueniev-Hackenberg E, Klug G, et al. (2005) The archaeal exosome core is a hexameric ring structure with three catalytic subunits nsmb952 [pii] 10.1038/nsmb952 [doi]. *Nat Struct Mol Biol* 12: 575–581.
35. Evgueniev-Hackenberg E, Walter P, Hochleitner E, Lottspeich F, Klug G (2003) An exosome-like complex in *Sulfolobus solfataricus* 10.1038/sj.embor.embor929 [doi] embor929 [pii]. *EMBO Rep* 4: 889–893.
36. Makarova KS, Koonin EV (2005) Evolutionary and functional genomics of the Archaea S1369-5274(05)00119-0 [pii] 10.1016/j.mib.2005.08.003 [doi]. *Curr Opin Microbiol* 8: 586–594.
37. Portnoy V, Evgueniev-Hackenberg E, Klein F, Walter P, Lorentzen E, et al. (2005) RNA polyadenylation in Archaea: not observed in *Haloferax* while the exosome polynucleotidylates RNA in *Sulfolobus* 7400571 [pii] 10.1038/sj.embor.7400571 [doi]. *EMBO Rep* 6: 1188–1193.
38. Walter P, Klein F, Lorentzen E, Ilchmann A, Klug G, et al. (2006) Characterization of native and reconstituted exosome complexes from the hyperthermophilic archaeon *Sulfolobus solfataricus* MMI5393 [pii] 10.1111/j.1365-2958.2006.05393.x [doi]. *Mol Microbiol* 62: 1076–1089.
39. Tan S, Kern RC, Selleck W (2005) The pST44 polycistronic expression system for producing protein complexes in *Escherichia coli*. *Protein Expression and Purification* 40: 385–395.
40. Barrios A, Selleck W, Hnatkovich B, Kramer R, Sermwittayawong D, et al. (2007) Expression and purification of recombinant yeast Ada2/Ada3/Gcn5 and Piccolo NuA4 histone acetyltransferase complexes. *Methods (San Diego, Calif)* 41: 271–277.
41. Selleck W, Tan S (2008) Recombinant protein complex expression in *E. coli*. *Curr Protoc Protein Sci Chapter 5: Unit 5 21*.
42. Otwinowski Z, Minor W (1997) Processing of X-ray diffraction data collected in oscillation mode. *Methods in enzymology* 276: 307–326.
43. Leslie AG (2006) The integration of macromolecular diffraction data. *Acta Crystallogr D Biol Crystallogr* 62: 48–57.
44. Lorentzen E, Conti E (2008) Expression, reconstitution, and structure of an archaeal RNA degrading exosome. *Methods in Enzymology* 447: 417–435.
45. Koonin EV, Wolf YI, Aravind L (2001) Prediction of the archaeal exosome and its connections with the proteasome and the translation and transcription machineries by a comparative-genomic approach 10.1101/gr.162001 [doi]. *Genome Res* 11: 240–252.
46. Ke A, Doudna JA (2004) Crystallization of RNA and RNA-protein complexes. *Methods (San Diego, Calif)* 34: 408–414.
47. Storoni LC, McCoy AJ, Read RJ (2004) Likelihood-enhanced fast rotation functions. *Acta crystallographicaSection D, Biological crystallography* 60: 432–438.
48. Collaborative Computational Project N (1994) The CCP4 suite: programs for protein crystallography. *Acta crystallographicaSection D, Biological crystallography* 50: 760–763.
49. Emsley P, Cowtan K (2004) Coot: Model-building tools for molecular graphics. *Acta crystallographicaSection D, Biological crystallography* 60: 2126–2132.
50. Brunger AT, Adams PD, Clore GM, DeLano WL, Gros P, et al. (1998) Crystallography & NMR system: A new software suite for macromolecular structure determination. *Acta crystallographicaSection D, Biological crystallography* 54: 905–921.
51. Merritt EA (1999) Expanding the model: anisotropic displacement parameters in protein structure refinement. *Acta Crystallogr D Biol Crystallogr* 55: 1109–1117.
